# Supplementary material for: Memory Deficits in Parkinson’s Disease Are Associated with Impaired Attentional Filtering and Memory Consolidation Processes
Source: MDPI journal article supplement (doi:10.3390/jcm12144594), 2023-07-10
Supplement: s1 [file s1]

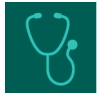

**Table S1.** Association analyses of MRI structural metrics with memory K scores for controls and PD patients .

1

| <b>a-1. Controls (N=22)</b>                                                        |                                |                                  |                   |                                 |                     |                     |                     |                                |
|------------------------------------------------------------------------------------|--------------------------------|----------------------------------|-------------------|---------------------------------|---------------------|---------------------|---------------------|--------------------------------|
| <i>Correlation coefficient R</i>                                                   |                                |                                  |                   |                                 |                     |                     |                     |                                |
| <i>(p-value)</i>                                                                   |                                |                                  |                   |                                 |                     |                     |                     |                                |
|                                                                                    | Delayed Memory                 |                                  |                   | Working Memory                  |                     |                     |                     |                                |
|                                                                                    | Low-Load                       | Low-Load<br>with Distrac-<br>tor | High-Load         | Memory<br>Load<br>2             | Memory<br>Load<br>3 | Memory<br>Load<br>4 | Memory<br>Load<br>5 | Memory<br>Load<br>6            |
| Areas related to the ventral attentional system                                    |                                |                                  |                   |                                 |                     |                     |                     |                                |
| L. inferior Frontal-Opercular                                                      | 0.372<br>(0.107)               | -0.017<br>(0.944)                | -0.062<br>(0.794) | <b>0.481</b><br><b>(0.032)</b>  | 0.208<br>(0.380)    | 0.314<br>(0.178)    | 0.022<br>(0.928)    | 0.067<br>(0.780)               |
| L. Inferior Frontal-Triangular                                                     | 0.222<br>(0.348)               | -0.177<br>(0.456)                | 0.122<br>(0.607)  | 0.440<br>(0.052)                | 0.362<br>(0.117)    | 0.365<br>(0.114)    | 0.025<br>(0.916)    | 0.123<br>(0.606)               |
| L. middle Frontal Gyrus                                                            | 0.254<br>(0.279)               | -0.34<br>(0.887)                 | 0.-99<br>(0.679)  | 0.076<br>(0.752)                | -0.084<br>(0.725)   | 0.052<br>(0.828)    | -0.099<br>(0.677)   | 0.190<br>(0.423)               |
| L. Angular Gyrus                                                                   | 0.190<br>(0.422)               | 0.068<br>(0.776)                 | 0.258<br>(0.271)  | -0.072<br>(0.762)               | -0.049<br>(0.838)   | -0.013<br>(0.955)   | 0.110<br>(0.644)    | 0.306<br>(0.190)               |
| L. Supra-marginal gyrus                                                            | 0.149<br>(0.531)               | -0.094<br>(0.693)                | -0.011<br>(0.964) | 0.064<br>(0.790)                | -0.119<br>(0.618)   | 0.025<br>(0.918)    | -0.094<br>(0.693)   | -0.079<br>(0.740)              |
| L. superior Temporal gyrus                                                         | -0.144<br>(0.546)              | -0.299<br>(0.201)                | -0.311<br>(0.181) | <b>-0.448</b><br><b>(0.048)</b> | -0.359<br>(0.120)   | -0.383<br>(0.095)   | -0.121<br>(0.613)   | -0.009<br>(0.969)              |
| Areas related to the dorsal attentional system and working memory storage capacity |                                |                                  |                   |                                 |                     |                     |                     |                                |
| L. superior Frontal gyrus                                                          | <b>0.466</b><br><b>(0.038)</b> | 0.148<br>(0.532)                 | 0.070<br>(0.770)  | 0.088<br>(0.711)                | 0.160<br>(0.499)    | 0.221<br>(0.350)    | 0.107<br>(0.653)    | <b>0.460</b><br><b>(0.041)</b> |
| L. superior Parietal Gyrus                                                         | 0.292<br>(0.212)               | 0.098<br>(0.680)                 | 0.020<br>(0.935)  | -0.071<br>(0.765)               | 0.021<br>(0.930)    | -0.008<br>(0.975)   | -0.223<br>(0.346)   | 0.050<br>(0.835)               |
| L. Intra-parietal Sulcus                                                           | 0.346<br>(0.135)               | 0.133<br>(0.577)                 | -0.052<br>(0.829) | -0.214<br>(0.364)               | 0.004<br>(0.988)    | -0.022<br>(0.926)   | -0.101<br>(0.673)   | 0.092<br>(0.701)               |
| Areas related to episodic memory                                                   |                                |                                  |                   |                                 |                     |                     |                     |                                |
| L. Entorhinal Cortex                                                               | -0.021<br>(0.929)              | 0.155<br>(0.514)                 | 0.246<br>(0.296)  | 0.315<br>(0.176)                | 0.429<br>(0.059)    | 0.332<br>(0.152)    | 0.265<br>(0.259)    | 0.255<br>(0.278)               |
| L. Para-hippocampal Gyrus                                                          | 0.027<br>(0.911)               | 0.034<br>(0.887)                 | 0.057<br>(0.810)  | -0.045<br>(0.851)               | -0.138<br>(0.561)   | -0.181<br>(0.44)    | -0.253<br>(0.283)   | -0.351<br>(0.129)              |
| L. hippocampal volume                                                              | 0.118<br>(0.622)               | 0.275<br>(0.240)                 | 0.166<br>(0.483)  | 0.366<br>(0.113)                | 0.155<br>(0.514)    | 0.350<br>(0.131)    | 0.183<br>(0.441)    | 0.030<br>(0.900)               |

| a-2. Controls (N=22)                                                               |                  |                             |                   |                     |                     |                     |                     |                                |
|------------------------------------------------------------------------------------|------------------|-----------------------------|-------------------|---------------------|---------------------|---------------------|---------------------|--------------------------------|
| Correlation coefficient R                                                          |                  |                             |                   |                     |                     |                     |                     |                                |
| (p-value)                                                                          |                  |                             |                   |                     |                     |                     |                     |                                |
|                                                                                    | Delayed Memory   |                             |                   | Working Memory      |                     |                     |                     |                                |
|                                                                                    | Low-Load         | Low-Load<br>with Distractor | High-Load         | Memory<br>Load<br>2 | Memory<br>Load<br>3 | Memory<br>Load<br>4 | Memory<br>Load<br>5 | Memory<br>Load<br>6            |
| Areas related to the ventral attentional system                                    |                  |                             |                   |                     |                     |                     |                     |                                |
| R. inferior Frontal-Opercular                                                      | 0.224<br>(0.343) | 0.109<br>(0.648)            | 0.104<br>(0.663)  | 0.198<br>(0.403)    | -0.088<br>(0.712)   | 0.123<br>(0.605)    | -0.140<br>(0.556)   | -0.052<br>(0.829)              |
| R. Inferior Frontal-Triangular                                                     | 0.327<br>(0.160) | 0.054<br>(0.823)            | -0.042<br>(0.860) | -0.218<br>(0.355)   | -0.098<br>(0.680)   | -0.180<br>(0.448)   | -0.249<br>(0.289)   | -0.084<br>(0.726)              |
| R. middle Frontal Gyrus                                                            | 0.397<br>(0.083) | 0.239<br>(0.311)            | 0.242<br>(0.303)  | -0.045<br>(0.850)   | 0.054<br>(0.820)    | 0.191<br>(0.421)    | 0.085<br>(0.722)    | 0.256<br>(0.277)               |
| R. Angular Gyrus                                                                   | 0.084<br>(0.725) | -0.041<br>(0.864)           | -0.028<br>(0.906) | -0.116<br>(0.627)   | 0.048<br>(0.840)    | -0.070<br>(0.770)   | 0.092<br>(0.701)    | 0.190<br>(0.422)               |
| R. Supra-marginal gyrus                                                            | 0.319<br>(0.171) | 0.101<br>(0.672)            | -0.117<br>(0.623) | -0.232<br>(0.325)   | -0.075<br>(0.755)   | -0.264<br>(0.261)   | -0.320<br>(0.169)   | -0.105<br>(0.659)              |
| R. superior Temporal gyrus                                                         | 0.281<br>(0.231) | 0.051<br>(0.831)            | -0.005<br>(0.982) | -0.235<br>(0.319)   | -0.3005<br>(0.198)  | -0.253<br>(0.2883)  | -0.328<br>(0.158)   | -0.155<br>(0.515)              |
| Areas related to the dorsal attentional system and working memory storage capacity |                  |                             |                   |                     |                     |                     |                     |                                |
| R. superior Frontal gyrus                                                          | 0.324<br>(0.164) | 0.108<br>(0.649)            | 0.034<br>(0.886)  | 0.007<br>(0.975)    | 0.121<br>(0.613)    | 0.109<br>(0.648)    | 0.235<br>(0.318)    | <b>0.512</b><br><b>(0.021)</b> |
| R. superior Parietal Gyrus                                                         | 0.211<br>(0.371) | 0.096<br>(0.688)            | 0.115<br>(0.628)  | -0.161<br>(0.498)   | 0.102<br>(0.669)    | -0.080<br>(0.738)   | 0.037<br>(0.876)    | 0.276<br>(0.239)               |
| R. Intra-parietal Sulcus                                                           | 0.151<br>(0.525) | 0.024<br>(0.920)            | 0.010<br>(0.965)  | -0.232<br>(0.326)   | -0.055<br>(0.818)   | -0.129<br>(0.587)   | 0.087<br>(0.717)    | 0.232<br>(0.325)               |
| Areas related to episodic memory                                                   |                  |                             |                   |                     |                     |                     |                     |                                |
| R. Entorhinal Cortex                                                               | 0.260<br>(0.268) | 0.058<br>(0.809)            | 0.320<br>(0.170)  | 0.249<br>(0.290)    | 0.098<br>(0.683)    | 0.261<br>(0.266)    | 0.006<br>(0.982)    | 0.238<br>(0.313)               |
| R. Para-hippocampal Gyrus                                                          | 0.068<br>(0.775) | 0.030<br>(0.899)            | 0.024<br>(0.922)  | -0.124<br>(0.601)   | -0.286<br>(0.221)   | -0.145<br>(0.543)   | -0.068<br>(0.774)   | -0.265<br>(0.258)              |
| R. hippocampal volume                                                              | 0.061<br>(0.798) | 0.144<br>(0.544)            | 0.061<br>(0.798)  | 0.279<br>(0.234)    | -0.020<br>(0.934)   | 0.255<br>(0.277)    | 0.114<br>(0.632)    | -0.063<br>(0.792)              |

| <b>b-1. PD Patients (N=19)</b>                                                     |                                |                                |                   |                                 |                                |                                 |                                |                                 |
|------------------------------------------------------------------------------------|--------------------------------|--------------------------------|-------------------|---------------------------------|--------------------------------|---------------------------------|--------------------------------|---------------------------------|
| <i>Correlation coefficient R</i>                                                   |                                |                                |                   |                                 |                                |                                 |                                |                                 |
| <i>(p-value)</i>                                                                   |                                |                                |                   |                                 |                                |                                 |                                |                                 |
| Delayed Memory                                                                     |                                |                                |                   | Working Memory                  |                                |                                 |                                |                                 |
|                                                                                    | Low-Load                       | Low-Load with Distractor       | High-Load         | Memory Load 2                   | Memory Load 3                  | Memory Load 4                   | Memory Load 5                  | Memory Load 6                   |
| Areas related to the ventral attentional system                                    |                                |                                |                   |                                 |                                |                                 |                                |                                 |
| L. inferior Frontal-Opercular                                                      | 0.237<br>(0.360)               | 0.330<br>(0.196)               | 0.255<br>(0.322)  | <b>0.640*</b><br><b>(0.006)</b> | <b>0.546</b><br><b>(0.024)</b> | <b>0.505</b><br><b>(0.039)</b>  | 0.293<br>(0.254)               | <b>0.487</b><br><b>(0.047)</b>  |
| L. Inferior Frontal-Triangular                                                     | 0.206<br>(0.427)               | 0.195<br>(0.453)               | 0.019<br>(0.941)  | <b>0.582</b><br><b>(0.014)</b>  | <b>0.489</b><br><b>(0.046)</b> | 0.429<br>(0.086)                | 0.173<br>(0.506)               | 0.212<br>(0.414)                |
| L. middle Frontal Gyrus                                                            | -0.219<br>(0.398)              | -0.259<br>(0.315)              | 0.133<br>(0.610)  | 0.125<br>(0.634)                | 0.170<br>(0.513)               | 0.162<br>(0.534)                | -0.050<br>(0.848)              | 0.475<br>(0.054)                |
| L. Angular Gyrus                                                                   | 0.046<br>(0.861)               | 0.161<br>(0.538)               | 0.258<br>(0.318)  | 0.215<br>(0.408)                | 0.284<br>(0.269)               | 0.023<br>(0.930)                | -0.025<br>(0.923)              | 0.256<br>(0.322)                |
| L. Supra-marginal gyrus                                                            | 0.263<br>(0.309)               | 0.232<br>(0.370)               | 0.414<br>(0.099)  | 0.466<br>(0.060)                | 0.431<br>(0.084)               | 0.208<br>(0.423)                | 0.162<br>(0.535)               | <b>0.679*</b><br><b>(0.003)</b> |
| L. superior Temporal Gyrus                                                         | <b>0.493</b><br><b>(0.044)</b> | <b>0.563</b><br><b>(0.019)</b> | 0.359<br>(0.157)  | <b>0.604*</b><br><b>(0.010)</b> | <b>0.575</b><br><b>(0.016)</b> | <b>0.714*</b><br><b>(0.001)</b> | <b>0.594</b><br><b>(0.012)</b> | <b>0.595</b><br><b>(0.012)</b>  |
| Areas related to the dorsal attentional system and working memory storage capacity |                                |                                |                   |                                 |                                |                                 |                                |                                 |
| L. superior Frontal gyrus                                                          | -0.112<br>(0.668)              | -0.215<br>(0.407)              | 0.115<br>(0.660)  | 0.134<br>(0.607)                | 0.203<br>(0.434)               | 0.010<br>(0.969)                | -0.086<br>(0.744)              | -0.093<br>(0.724)               |
| L. superior Parietal Gyrus                                                         | 0.188<br>(0.469)               | 0.037<br>(0.887)               | 0.165<br>(0.526)  | 0.417<br>(0.096)                | 0.464<br>(0.061)               | 0.271<br>(0.293)                | 0.307<br>(0.231)               | 0.355<br>(0.162)                |
| L. Intra-parietal Sulcus                                                           | 0.359<br>(0.157)               | 0.139<br>(0.596)               | 0.315<br>(0.219)  | 0.325<br>(0.203)                | <b>0.568</b><br><b>(0.017)</b> | 0.211<br>(0.417)                | 0.282<br>(0.274)               | 0.346<br>(0.174)                |
| Areas related to episodic memory                                                   |                                |                                |                   |                                 |                                |                                 |                                |                                 |
| L. Entorhinal Cortex                                                               | 0.012<br>(0.965)               | 0.156<br>(0.550)               | -0.215<br>(0.408) | 0.065<br>(0.804)                | -0.197<br>(0.448)              | -0.062<br>(0.812)               | -0.038<br>(0.885)              | -0.170<br>(0.515)               |
| L. Para-hippocampal Gyrus                                                          | 0.156<br>(0.549)               | 0.168<br>(0.520)               | 0.363<br>(0.152)  | -0.107<br>(0.683)               | 0.217<br>(0.403)               | 0.014<br>(0.958)                | -0.112<br>(0.669)              | 0.391<br>(0.121)                |
| L. hippocampal volume                                                              | -0.099<br>(0.704)              | -0.195<br>(0.453)              | -0.246<br>(0.342) | 0.246<br>(0.342)                | 0.098<br>(0.708)               | -0.052<br>(0.842)               | 0.021<br>(0.936)               | -0.048<br>(0.856)               |
| <b>b-2. PD Patients (N=19)</b>                                                     |                                |                                |                   |                                 |                                |                                 |                                |                                 |
| <i>Correlation coefficient R</i>                                                   |                                |                                |                   |                                 |                                |                                 |                                |                                 |
| <i>(p-value)</i>                                                                   |                                |                                |                   |                                 |                                |                                 |                                |                                 |
| Delayed Memory                                                                     |                                |                                |                   | Working Memory                  |                                |                                 |                                |                                 |
|                                                                                    | Low-Load                       | Low-Load with Distractor       | High-Load         | Memory Load 2                   | Memory Load 3                  | Memory Load 4                   | Memory Load 5                  | Memory Load 6                   |
| Areas related to the ventral attentional system                                    |                                |                                |                   |                                 |                                |                                 |                                |                                 |
| R. inferior Frontal-Opercular                                                      | -0.243<br>(0.348)              | -0.073<br>(0.779)              | 0.255<br>(0.323)  | 0.262<br>(0.309)                | 0.094<br>(0.719)               | 0.227<br>(0.381)                | 0.009<br>(0.971)               | <b>0.681*</b><br><b>(0.003)</b> |
| R. Inferior Frontal-Triangular                                                     | -0.118<br>(0.652)              | -0.034<br>(0.896)              | -0.288<br>(0.262) | -0.077<br>(0.768)               | -0.183<br>(0.482)              | -0.308<br>(0.229)               | -0.421<br>(0.093)              | 0.026<br>(0.920)                |
| R. middle Frontal                                                                  | 0.082                          | 0.052                          | 0.123             | 0.190                           | 0.368                          | 0.227                           | 0.005                          | 0.168                           |

|                                                                                    |                                |                   |                   |                                |                                 |                   |                   |                                 |
|------------------------------------------------------------------------------------|--------------------------------|-------------------|-------------------|--------------------------------|---------------------------------|-------------------|-------------------|---------------------------------|
| Gyrus                                                                              | (0.754)                        | (0.842)           | (0.637)           | (0.465)                        | (0.147)                         | (0.381)           | (0.984)           | (0.520)                         |
| R. Angular Gyrus                                                                   | 0.027<br>(0.917)               | 0.217<br>(0.404)  | -0.038<br>(0.884) | 0.203<br>(0.436)               | 0.148<br>(0.571)                | 0.086<br>(0.743)  | -0.098<br>(0.709) | 0.238<br>(0.358)                |
| R. Supra-marginal gyrus                                                            | -0.071<br>(0.786)              | 0.149<br>(0.569)  | 0.227<br>(0.381)  | 0.365<br>(0.150)               | 0.217<br>(0.403)                | 0.240<br>(0.353)  | 0.005<br>(0.984)  | <b>0.0570</b><br><b>(0.017)</b> |
| R. superior Temporal Gyrus                                                         | -0.002<br>(0.993)              | 0.125<br>(0.634)  | 0.004<br>(0.988)  | <b>0.514</b><br><b>(0.035)</b> | 0.279<br>(0.278)                | 0.369<br>(0.145)  | 0.218<br>(0.402)  | 0.104<br>(0.690)                |
| Areas related to the dorsal attentional system and working memory storage capacity |                                |                   |                   |                                |                                 |                   |                   |                                 |
| R. superior Frontal gyrus                                                          | 0.232<br>(0.370)               | 0.253<br>(0.327)  | 0.134<br>(0.608)  | <b>0.550</b><br><b>(0.022)</b> | <b>0.568*</b><br><b>(0.017)</b> | 0.370<br>(0.144)  | 0.217<br>(0.402)  | 0.107<br>(0.684)                |
| R. superior Parietal Gyrus                                                         | 0.375<br>(0.138)               | 0.417<br>(0.096)  | 0.295<br>(0.251)  | <b>0.568</b><br><b>(0.017)</b> | <b>0.630*</b><br><b>(0.007)</b> | 0.386<br>(0.126)  | 0.239<br>(0.356)  | 0.297<br>(0.248)                |
| R. Intra-parietal Sulcus                                                           | <b>0.490</b><br><b>(0.046)</b> | 0.438<br>(0.079)  | 0.115<br>(0.659)  | 0.442<br>(0.076)               | <b>0.574*</b><br><b>(0.016)</b> | 0.447<br>(0.072)  | 0.395<br>(0.117)  | <b>0.569</b><br><b>(0.017)</b>  |
| Areas related to episodic memory                                                   |                                |                   |                   |                                |                                 |                   |                   |                                 |
| R. Entorhinal Cortex                                                               | -0.202<br>(0.438)              | -0.004<br>(0.989) | -0.324<br>(0.204) | 0.110<br>(0.673)               | -0.039<br>(0.882)               | 0.017<br>(0.948)  | -0.032<br>(0.902) | -0.030<br>(0.908)               |
| R. Para-hippocampal Gyrus                                                          | -0.202<br>(0.436)              | -0.055<br>(0.834) | 0.088<br>(0.737)  | 0.025<br>(0.924)               | 0.070<br>(0.788)                | 0.070<br>(0.790)  | -0.130<br>(0.618) | 0.219<br>(0.398)                |
| R. hippocampal volume                                                              | -0.086<br>(0.744)              | -0.030<br>(0.910) | -0.304<br>(0.235) | 0.289<br>(0.261)               | 0.072<br>(0.784)                | -0.029<br>(0.913) | -0.031<br>(0.906) | -0.091<br>(0.729)               |

Association analysis results showing Pearson correlation coefficient R (p-value). \* indicates significant results at  $FWER=0.05$ . Association analyses were conducted with adjustment for age and education.
